# Supplementary material for: Well-defined, persistent, chiral phthalocyanine nanoclusters via G-quadruplex assembly
Source: Royal Society of Chemistry journal article supplement (doi:10.1039/c6cc04152c), 2016-01-01
Supplement: c6cc04152c1.pdf [file c6cc04152c1.pdf]

---

## Supporting Information

---

### Well-defined, persistent, chiral phthalocyanine nanoclusters via G-quadruplex assembly

Miguel García-Iglesias,<sup>a</sup> Tomas Torres <sup>a,b,\*</sup> and David González-Rodríguez <sup>a,\*</sup>

<sup>a</sup> *Departamento de Química Orgánica, Facultad de Ciencias, Universidad Autónoma de Madrid, 28049 Madrid, Spain.*

<sup>b</sup> *IMDEA Nanociencia, c/ Faraday 9, Campus de Cantoblanco, 28049, Spain.*

#### CONTENTS

|                                           |        |
|-------------------------------------------|--------|
| 1. Experimental Section. General Methods: | S2     |
| 2. Synthesis and Characterization         | S2-S7  |
| 3. <b>Figures S1-S6</b>                   | S8-S13 |
| 4. References                             | S14    |

## 1. GENERAL METHODS

**MALDI-TOF-MS** spectra were obtained from a *BRUKER ULTRAFLEX III* instrument equipped with a nitrogen laser operating at 337 nm. **NMR** spectra were recorded with a *BRUKER AC-300* (300 MHz) and *BRUKER DRX* 500 MHz instrument. The temperature was actively controlled at 298 K. Chemical shifts are measured in ppm using the signals of the deuterated solvent as the internal standard. **Column chromatography** was carried out on silica gel Merck-60 (230–400 mesh, 60 Å), and TLC on aluminum sheets precoated with silica gel 60 F254 (E. Merck). **UV/Vis spectra** were recorded with a *JASCO V-660*. **Emission spectra** were obtained with a *JASCO-V8600*. **CD spectra** were recorded with a *JASCO V-815* equipment. In all these instruments the temperature was controlled using a *JASCO Peltier* temperature controller with a range of 263–383 K, adjustable temperature slope and accuracy of  $\pm 0.1$  K.

## 2. SYNTHESIS AND CHARACTERIZATION

Chemicals were purchased from commercial suppliers and used without further purification. Solid, hygroscopic reagents were dried in a vacuum oven before use. Reaction solvents were thoroughly dried before use using standard methods. The synthesis and characterization of bromoguanosine **3** from commercial guanosine has been reported before by us.<sup>[1]</sup> The synthesis of ethynyl-Pc **2** (Scheme S1) is described below.

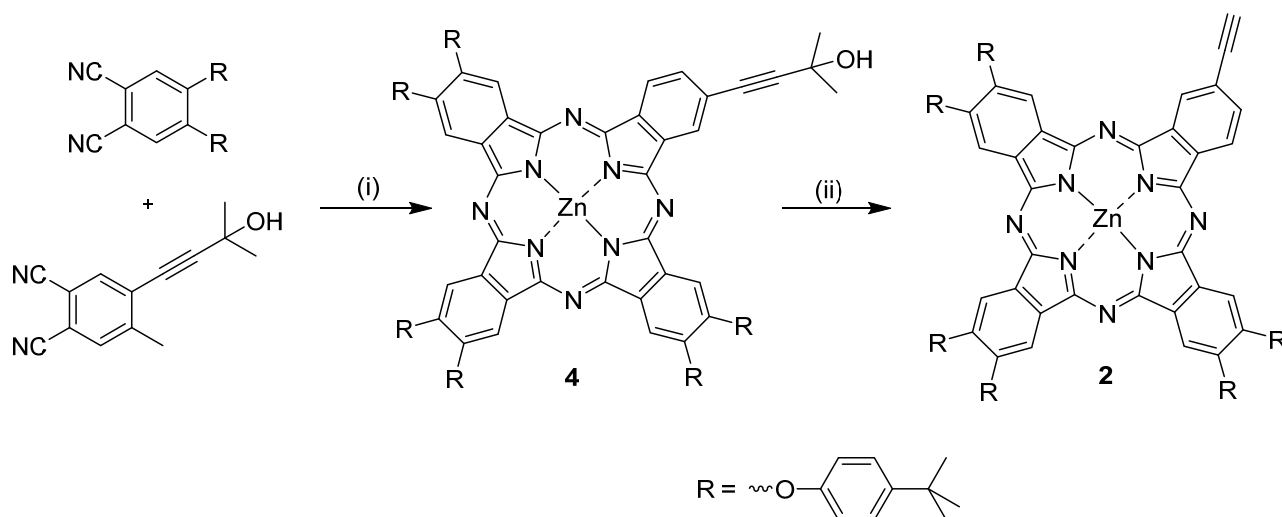

**Scheme S1.** Synthetic route to **2**: (i)  $ZnCl_2$ , DMAE, reflux, 16h, 14%. (ii) NaOH, toluene, reflux, 6h, 71%.

**2,3,9,10,16,17-*tert*-butylphenoxy-23-(3-hydroxy-3-methyl-1-butynyl)-5,28:14,19-diimino-7,12:21,26-dinitrilotetrabenzo[*c,h,m,r*][1,6,11,16]tetraazacicloecosinato-(2)-N<sup>29</sup>,N<sup>30</sup>,N<sup>31</sup>,N<sup>32</sup>zinc(II) (4)**

A dimethylaminoethanol (DMAE) (2 mL) solution of, 4,5-*tert*-butylphenoxyphthalonitrile<sup>[iii]</sup> (708 mg, 1.67 mmol), 4-(3-hydroxy-3-methyl-1-butynyl)phthalonitrile<sup>[iii]</sup> (117 mg, 0.55 mmol) and ZnCl<sub>2</sub> (75 mg, 0.55 mmol) was stirred at reflux under argon atmosphere for 16 h. The reaction was allowed to cool to room temperature and the crude was precipitated and triturated in methanol / water (1:1) mixture. The resulting green solid was then purified by column chromatography on silica gel using as a mobile phase hexane/dioxane (4:1). The fractions containing the desired product were then evaporated yielding phthalocyanine (**1**) as a green solid in 14% yield.

**M.p.:** > 250 °C. **<sup>1</sup>H NMR** (400 MHz, CDCl<sub>3</sub>, 25 °C, TMS),  $\delta$  = 8.8-7.8 (m, 8H), 7.73-7.52 (m, 1H), 7.75-7.2 (m, 12H), 7.2-6.9 (m, 12H), 1.65-1.1 (s, 60H) ppm. **FT-IR** (KBr): 2933, 2929, 2855, 1721, 1603, 1507, 1450, 1394, 1394, 1363, 1266, 1214, 1172, 1088, 1013, 891, 827, 743, 732, 545, 439 cm<sup>-1</sup>. **UV/Vis** (THF):  $\lambda_{\text{max}}$  (log  $\epsilon$ ) = 671 (5.1), 617 (4.6), 601 (4.4), 357 (4.8), 293 (4.6) nm. **MS** (MALDI-TOF, dithranol: *m/z* (%) 1546.65-1552.65 (100) [M]<sup>+</sup>. **HR MALDI-TOF MS**, dithranol: *m/z* 1546.6547 [M]<sup>+</sup>, calcd for C<sub>97</sub>H<sub>94</sub>N<sub>8</sub>O<sub>7</sub>Zn: 1546.6531.

**$^1\text{H}$  NMR of 4 ( $\text{CDCl}_3$ )**

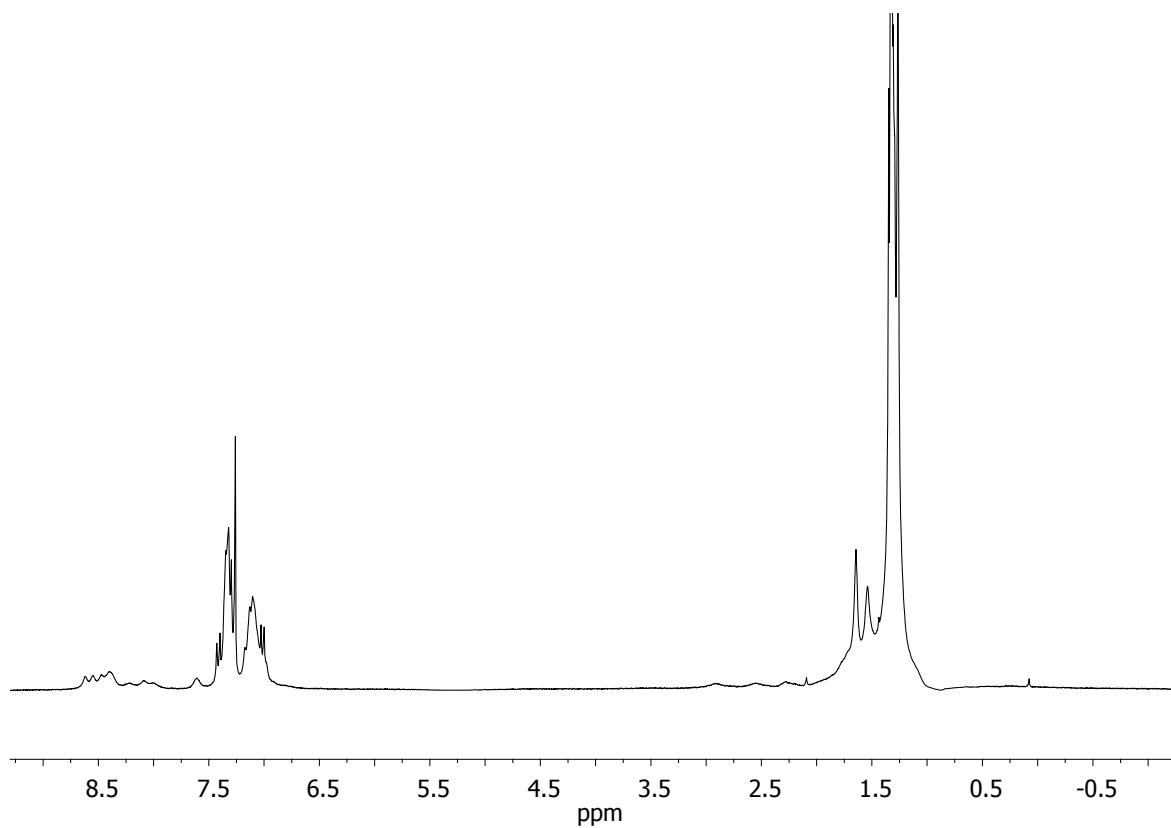

**MALDI-TOF spectra with (inset) isotopic distribution pattern HR-MALDI-TOF spectrum of 4**

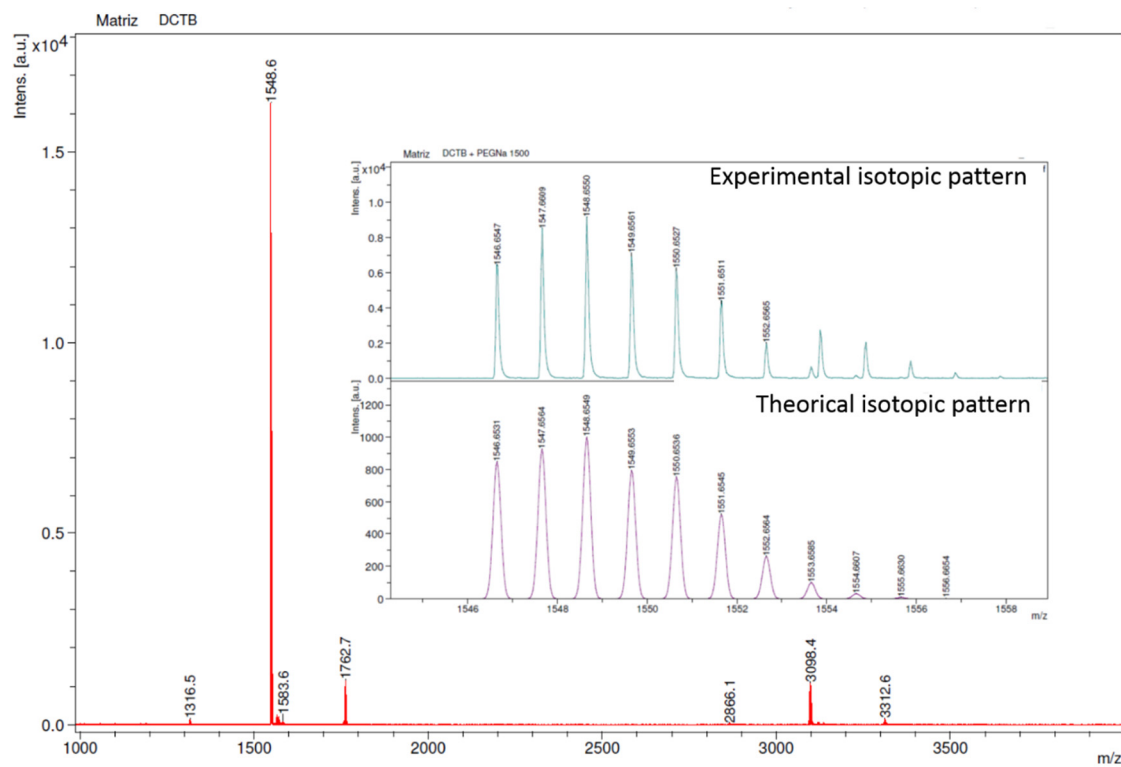

**2,3,9,10,16,17-*tert*-butylphenoxy-23-ethynyl-5,28:14,19-diimino-7,12:21,26-dinitrilotetrabenzo[*c,h,m,r*][1,6,11,16]tetraazacicloecosinato-(2)-N<sup>29</sup>,N<sup>30</sup>,N<sup>31</sup>,N<sup>32</sup>zinc(II) (2)**

A dry toluene solution (2 mL) of phthalocyanine **4** (108 mg, 0.07 mmol) and dry NaOH (3 mg, 0.075 mmol) was stirred in a 10 mL flask under reflux in argon atmosphere for six hours. The solvent was removed at the rotary evaporator and the solid residue was extracted with CH<sub>2</sub>Cl<sub>2</sub> and washed with water. The organic phase was dried over MgSO<sub>4</sub> and the solvent evaporated. The resulting crude was purified by column chromatography on silica gel using heane/ dioxane (5:1) as eluent. Phthalocyanine **2** was obtained as a green solid in a 71% yield.

**M.p.:** > 250 °C. **<sup>1</sup>H NMR** (500 MHz, THF-*d*<sub>8</sub>, 25 °C, TMS), δ 9.19 (s, 1H), 9.0 – 8.9 (m, 2H), 8.87 (s, 1H), 8.85 (s, 1H), 8.75 (s, 1H), 8.57 (s, 1H), 8.53 (s, 1H), 8.02-8.01 (m, 1H), 7.61–7.53 (m, 2H), 7.53–7.48 (m, 2H), 7.48–7.40 (m, 8H), 7.40 – 7.32 (m, 4H), 7.33 – 7.15 (m, 8H), 7.93 (s, 1H), 1.43 (s, 9H), 1.41(s, 9H), 1.37 (m, 36H) ppm. **<sup>13</sup>C NMR** (126 MHz, THF-*d*<sub>8</sub>, 25 °C, TMS), δ 157.49, 157.42, 157.29, 157.22, 156.81, 156.45, 153.69, 153.58, 153.51, 153.11, 153.07, 152.57, 152.55, 152.16, 152.13, 151.65, 151.42, 150.95, 150.50, 147.28, 147.00, 146.64, 146.54, 146.44, 146.42, 139.03, 138.56, 136.04, 135.95, 135.57, 135.42, 134.81, 133.27, 127.74, 127.70, 127.52, 127.49, 127.45, 127.39, 124.07, 123.61, 119.50, 119.09, 118.49, 118.35, 118.24, 118.20, 116.46, 116.37, 116.22, 116.06, 115.13, 114.04.85.56, 80.74, 35.30, 35.26, 35.18, 35.16, 32.20, 32.16 ppm. **FT-IR** (KBr): 2959, 2905, 2867, 2106, 1602, 1507, 1452, 1404, 1363, 1267, 1214, 1178, 1088, 1029, 892, 828, 744, 723, 547 cm<sup>-1</sup>. **UV/Vis** (THF): λ<sub>max</sub> (log ε) = 686 (5.2), 631 (4.4), 601 (4.2), 356 (4.7) nm. **MS** (MALDI-TOF, dithranol: m/z (%) 1488.6-1496.6 (100) [M]<sup>+</sup>. **HR MALDI-TOF MS**, dithranol: m/z 1488.6135 [M]<sup>+</sup>, calcd for C<sub>94</sub>H<sub>88</sub>N<sub>8</sub>O<sub>6</sub>Zn: 1488.6113.

**$^1\text{H}$  NMR of 2 (THF- $d_6$ )**

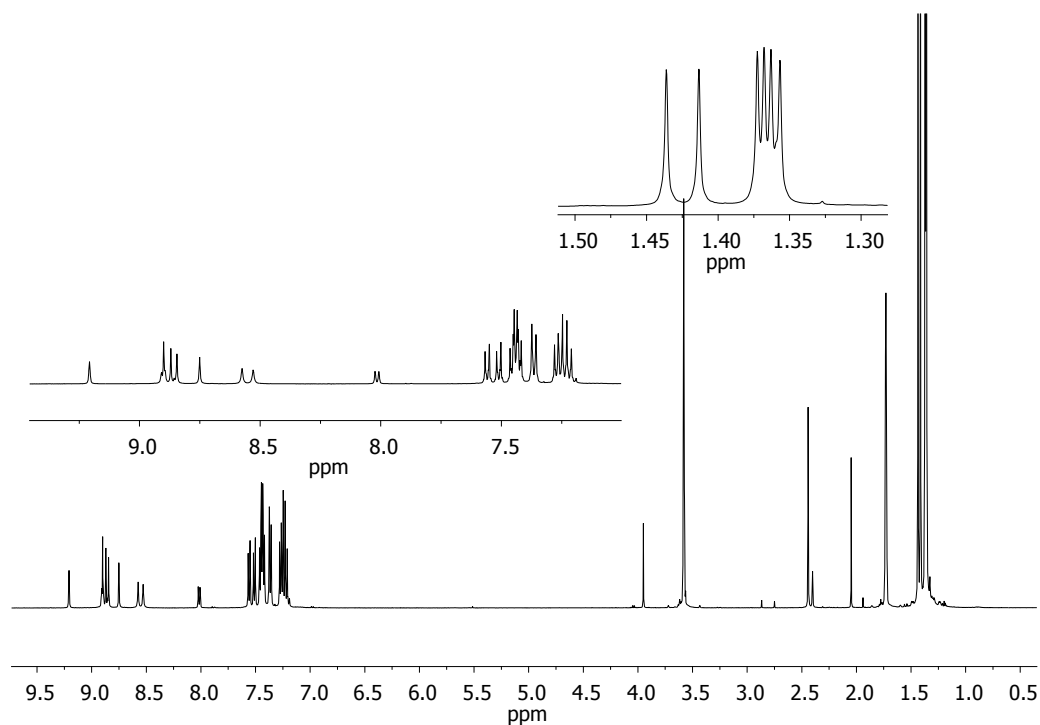

**MALDI-TOF spectra with (inset) isotopic distribution pattern HR-MALDI-TOF spectrum (b) of 2**

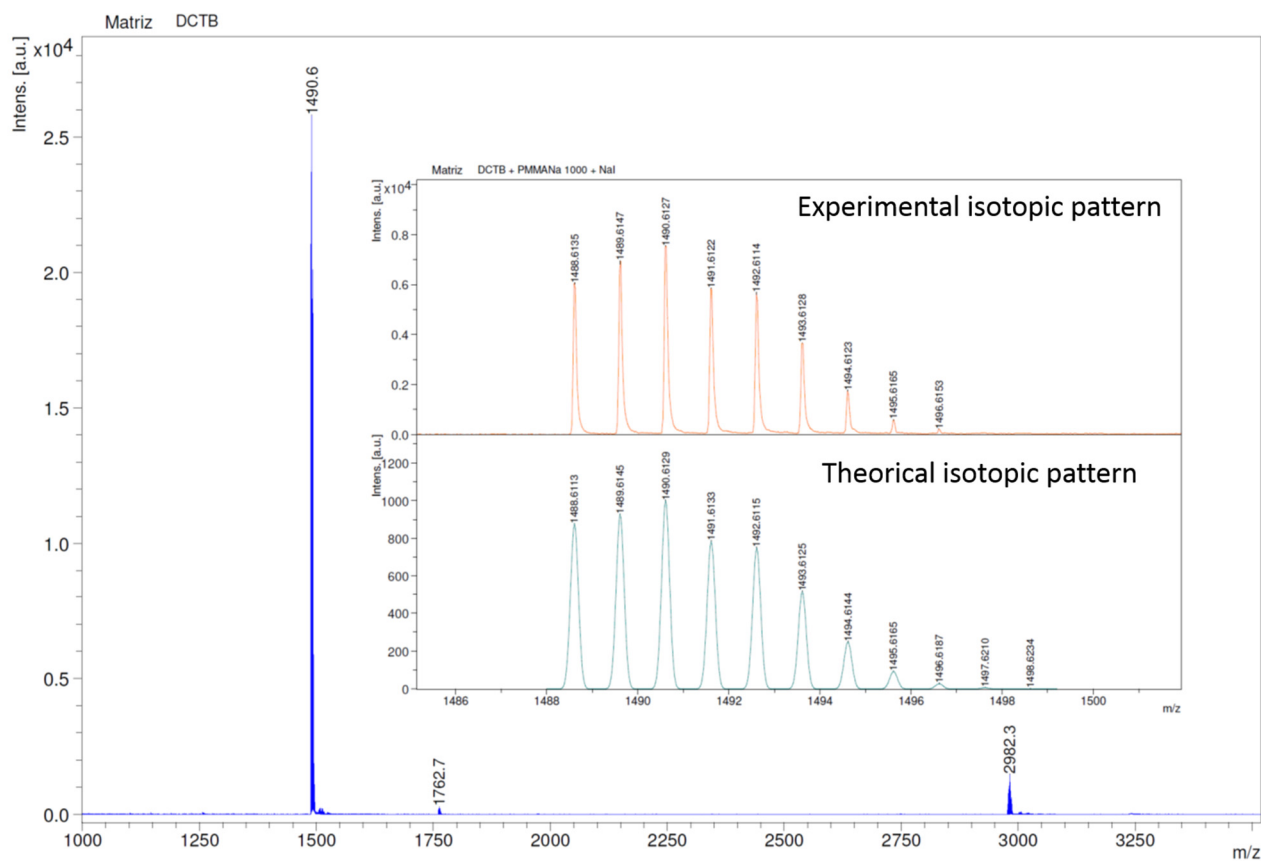

## Zn(II)Pc-G (1)

A dry a Toluene/THF/NEt(*i*Pr)<sub>2</sub> (3:1:1) mixture (2 mL) was subjected to deoxygenation by three freeze-pump-thaw cycles with argon and poured over a mixture of ethynyl-Pc **2** (236 mg, 0.16 mmol), bromoguanosine **3** (68 mg, 0.13 mmol), Pd(PPh<sub>3</sub>)<sub>4</sub> (2.3 mg, 0.002 mmol), and CuI (0.2 mg, 0.001 mmol). The mixture was stirred under argon for 16 h at 60 °C. Once the ethynyl derivative is consumed, monitored by TLC, the mixture was filtered over a celite plug and the solvent was evaporated under reduced pressure. The product was purified by two consecutive column chromatographies on silica gel using first hexane/1,4-dioxane (1:1) and then CHCl<sub>3</sub>/MeOH (50:1) as eluents, affording **1** as a green solid (30 mg, 12 %).

**M.p.:** > 250 °C. **<sup>1</sup>H NMR** (300 MHz, THF-*d*<sub>8</sub>- DMSO-*d*<sub>6</sub> (2:1), 25 °C, TMS), δ = 10.81 (s(b), 1H), 9.49 (s, 1H), 9.25 (d, 1H, *J*<sub>o</sub> = 6.5 Hz), 9.06 (s, 1H), 9.0 – 8.8 (m, 5H), 8.23 (d, 1H, *J*<sub>o</sub> = 6.5 Hz), 7.5 – 7.0 (m, 24H), 6.50 (s(b), 2H), 6.37 (s, 1H), 5.59 (d, 1H, *J* = 6.7 Hz), 5.22 (m, 1H), 4.16 (m, 1H), 3.77 (d, 2H, *J* = 6.8 Hz), 1.54 (s, 3H), 1.33 (s, 3H), 1.3-1.1 (m, 54H), 0.76 (s, 9H), -0.11 (s, 3H), -0.13 (s, 3H). **UV/Vis** (THF): λ<sub>max</sub> (log ε) = 687 (5.2), 615 (4.4), 356 (4.8) nm. **MS** (MALDI-TOF, dithranol): *m/z* (%) 1923.8-1932.8 (100) [M]<sup>+</sup>, 3847.5-3860.5 (20) [2M]<sup>+</sup>. **HR MALDI-TOF MS**, dithranol: *m/z* 1923.8056 [M]<sup>+</sup>, calcd for C<sub>113</sub>H<sub>117</sub>N<sub>13</sub>O<sub>11</sub>SiZn: 1923.8056.

### <sup>1</sup>H NMR of **1** (THF-*d*<sub>8</sub>- DMSO-*d*<sub>6</sub> (2:1))

SEE FIGURE S1 BELOW

### MALDI-TOF spectra with (inset) isotopic distribution pattern of **1**

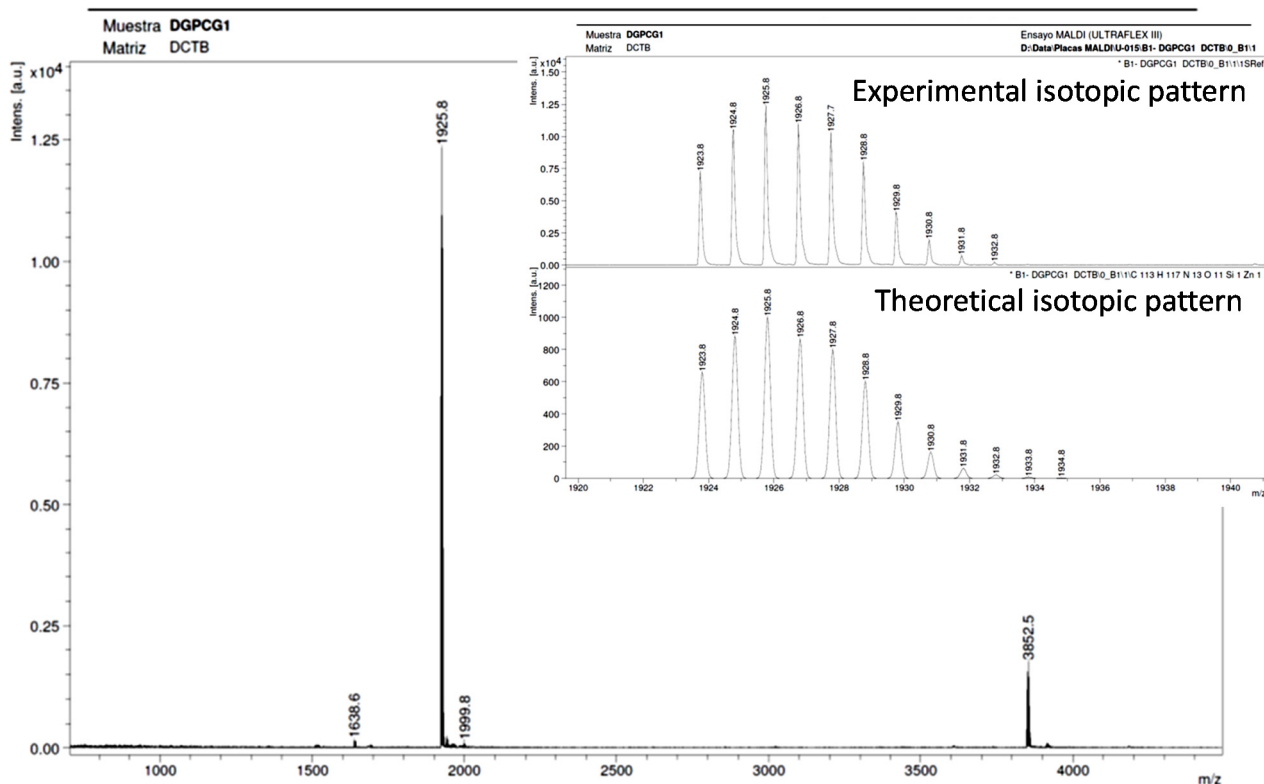

### 3. FIGURES S1-S5.

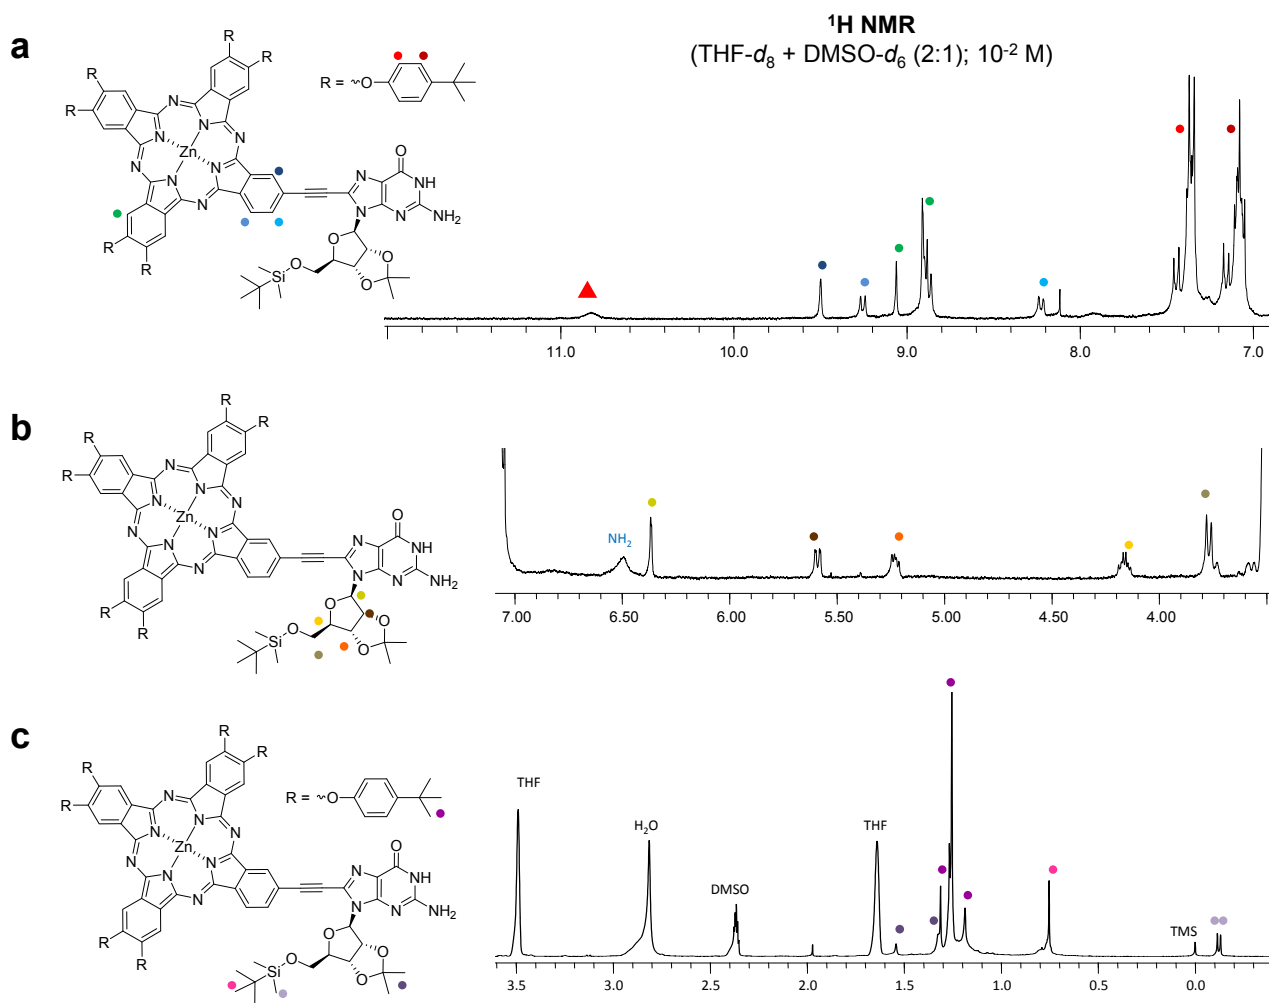

**Figure S1.** Three regions of the  $^1\text{H}$  NMR spectrum of Pc-G **1** in a 2:1 mixture of THF- $d_8$  and DMSO- $d_6$  where aggregation at a  $10^{-2}$  M concentration is prevented.

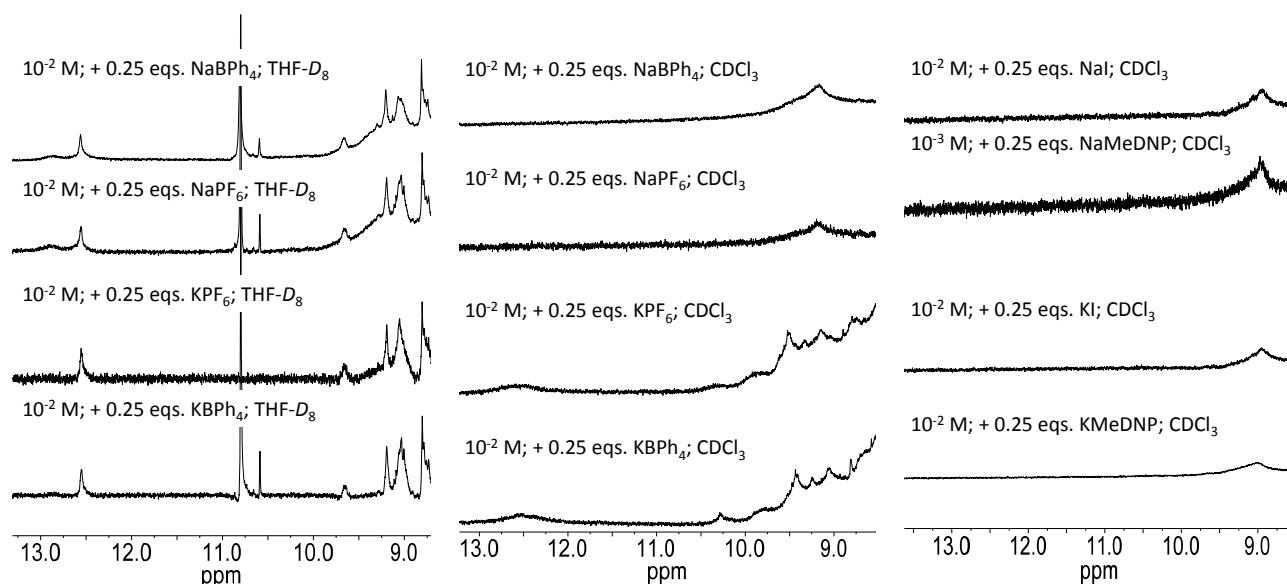

**Figure S2.** Low-field region of the  $^1\text{H}$  NMR spectrum of Pc-G **1** at 25 °C in different solvents in the presence of  $\text{K}^+$  or  $\text{Na}^+$  salts. Only in THF- $d_8$  well-resolved signals could be obtained that helped us assign quadruplex structure. The Pc-G **1** octamer can be assembled in this solvent at NMR concentrations in the presence of  $\text{K}^+$  or  $\text{Na}^+$  salts bearing non-coordinating anions like  $\text{BPh}_4^-$  or  $\text{PF}_6^-$ . However, the complexes with  $\text{Na}^+$  salts are weaker and showed only partial formation, revealing a mixture of the Pc-G **1** octamer (sharp signal at 12.5 ppm) and Pc-G **1** monomer (broad signal at 12.8 ppm) in slow exchange. In  $\text{CDCl}_3$  and toluene- $d_8$ , however, very broad signals were obtained that precluded any assignment. We believe the G-quadruplexes may further aggregate in these solvents at the high NMR concentrations. In acetone- $d_6$  the monomer and quadruplexes are not soluble enough.

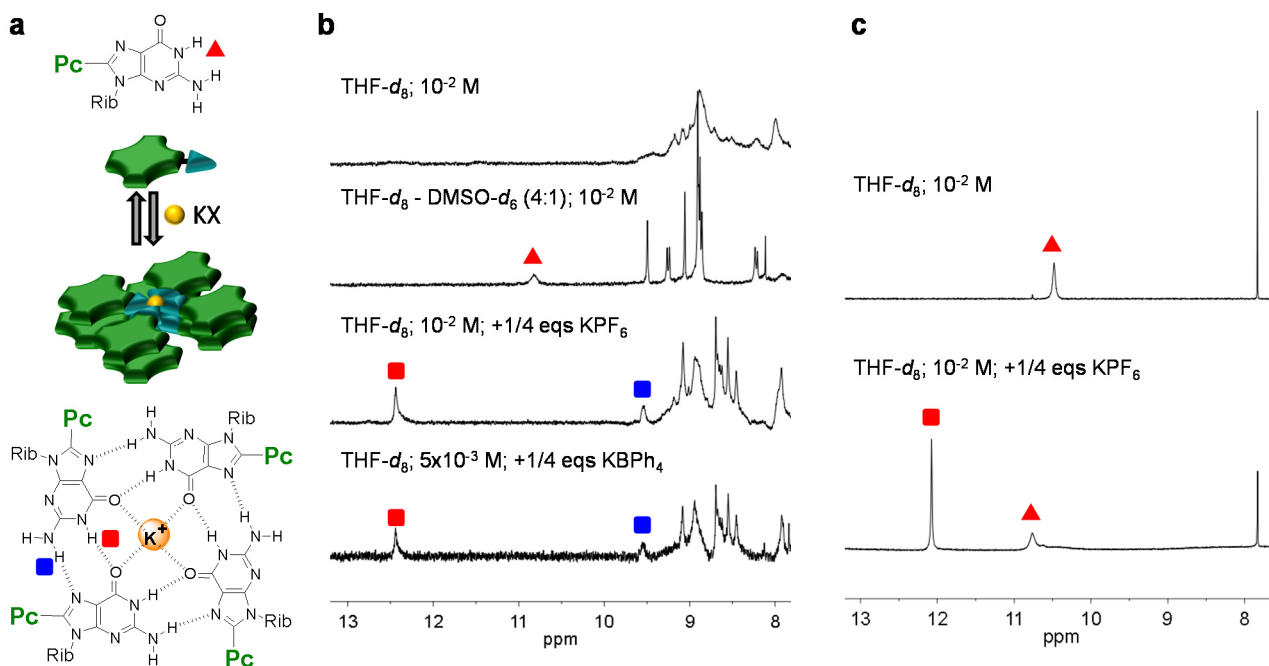

**Figure S3.** (a) Pc-G **1** octamer formation in the presence of K<sup>+</sup> salts. The most characteristic amide and amine protons are shown at the monomer and G-quartet states. (b) Low-field region of the <sup>1</sup>H NMR spectrum of Pc-G **1** in different solvents and concentrations and in the absence or presence of K<sup>+</sup> salts. (c) Low-field region of the <sup>1</sup>H NMR spectrum of G **3** in THF-*d*<sub>8</sub> at a 10<sup>-2</sup> M concentration in the absence or presence of KPF<sub>6</sub> salts.

In the presence of KPF<sub>6</sub>, a slow equilibrium between monomer **3** (red triangle) and the (**3**)<sub>8</sub>·K<sup>+</sup> complex (red square) was observed in THF-*d*<sub>8</sub>, as reported previously by us (see refs. 5g and 7c in the text). In contrast, in the same conditions, no signal for monomer **1** was detected (see 3<sup>rd</sup> spectrum in (b)), suggesting an additional stabilization of the quadruplex caused by the presence of the Pc macrocycle. This stabilization effect is further supported by the observation of the H-bound G-amine proton at around 9.5 ppm (blue square), which is typically found as a broad signal at room temperature for **3** and other G derivatives (see also Figure S3 and refs. 5g and 7c in the text).

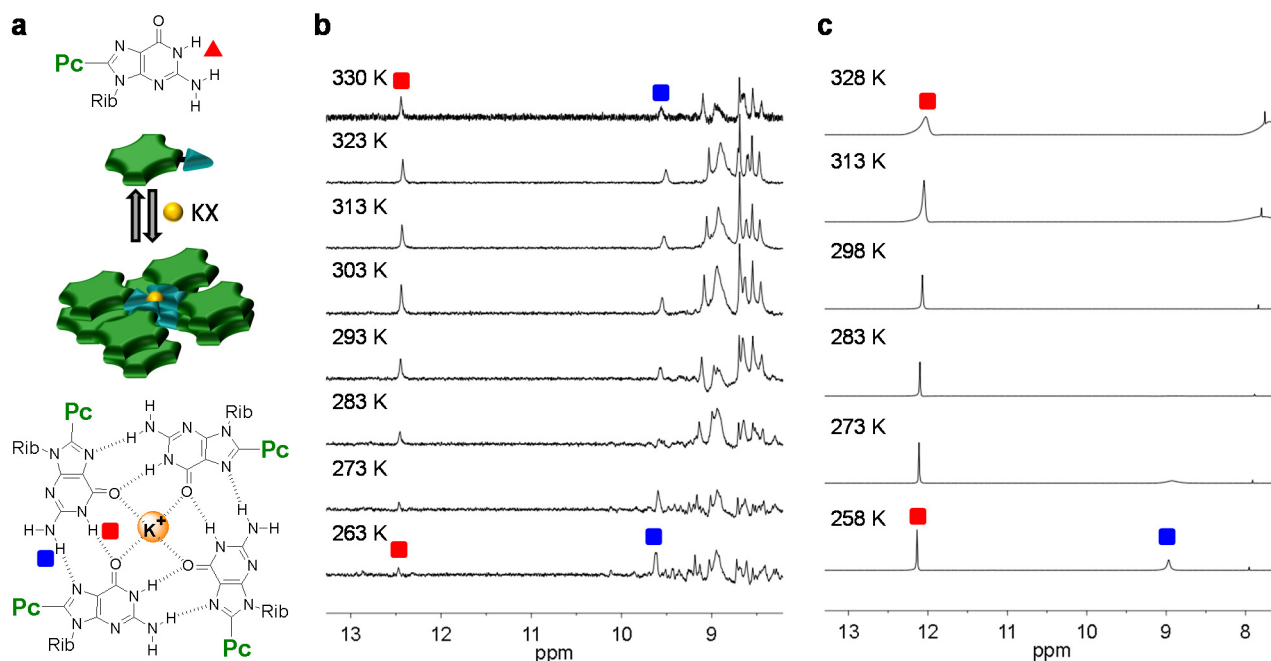

**Figure S4.** (a) Pc-G **1** octamer formation in the presence of K<sup>+</sup> salts. The most characteristic amide and amine protons are shown at the monomer and G-quartet states. (b,c) Low-field region of the <sup>1</sup>H NMR spectrum of (b) Pc-G **1** at a 10<sup>-2</sup> M concentration and (c) G **3** in THF-*d*<sub>8</sub> at a 10<sup>-1</sup> M concentration in the presence of KPF<sub>6</sub> salts and as a function of sample temperature.

The additional quadruplex stabilization brought by the presence of the Pc cores (please, compare Figures S3b and c) is manifested by the persistence of the H-bound G-amine proton at around 9.5 ppm (blue square) in the whole range of temperatures (for the the (**3**)<sub>8</sub>·K<sup>+</sup> complex it is only detected at low temperatures), and the constant shape and position of the G-amide proton signal in (**1**)<sub>8</sub>·K<sup>+</sup> (red square).

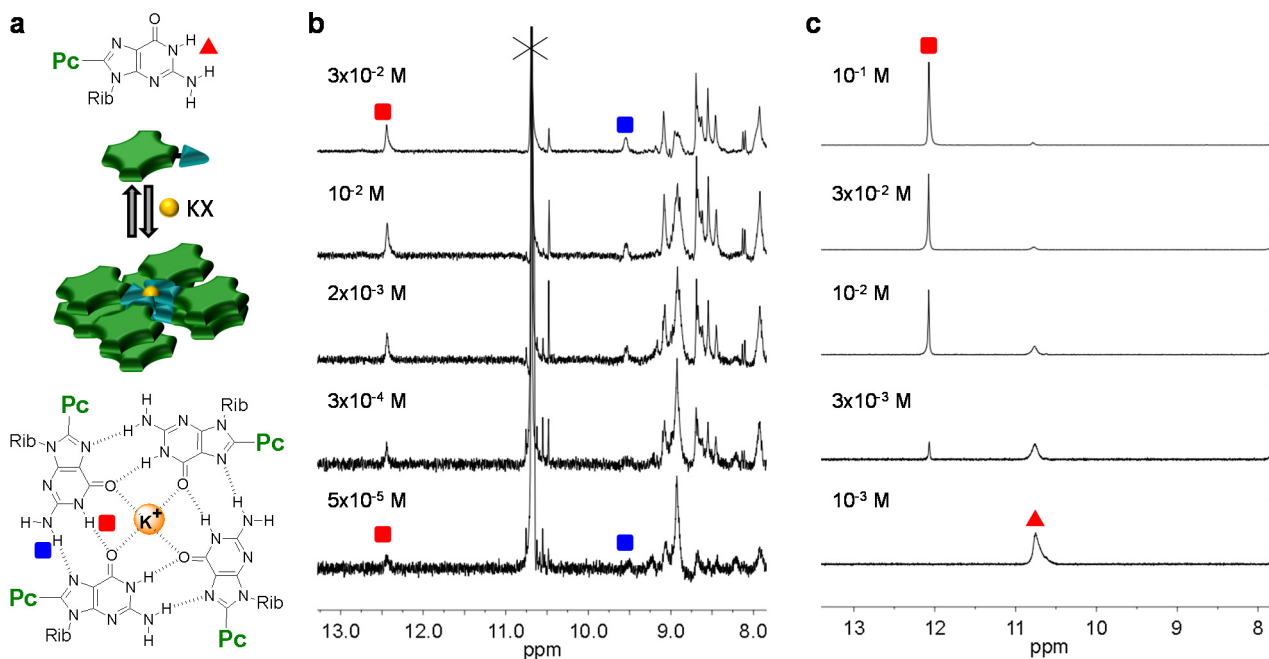

**Figure S5.** (a) Pc-G **1** octamer formation in the presence of K<sup>+</sup> salts. The most characteristic amide and amine protons are shown at the monomer and G-quartet states. (b,c) Low-field region of the <sup>1</sup>H NMR spectrum of (b) Pc-G **1** and (c) G **3** in THF-*d*<sub>8</sub> at room temperature in the presence of KPF<sub>6</sub> salts and as a function of sample concentration.

The additional quadruplex stabilization brought by the presence of the Pc cores (please, compare Figures S4b and c) is manifested again by the persistence of the H-bound G-amine proton at around 9.5 ppm (blue square) in the whole range of concentrations, and the constant shape and position of the G-amide proton signal (red square).

Also note that the (3)<sub>8</sub>·K<sup>+</sup> complex dissociates upon dilution and, at 10<sup>-3</sup> M, no signal of the octamer is detected anymore. In marked contrast, the (1)<sub>8</sub>·K<sup>+</sup> complex H-bound signals persist until the NMR detection limits.

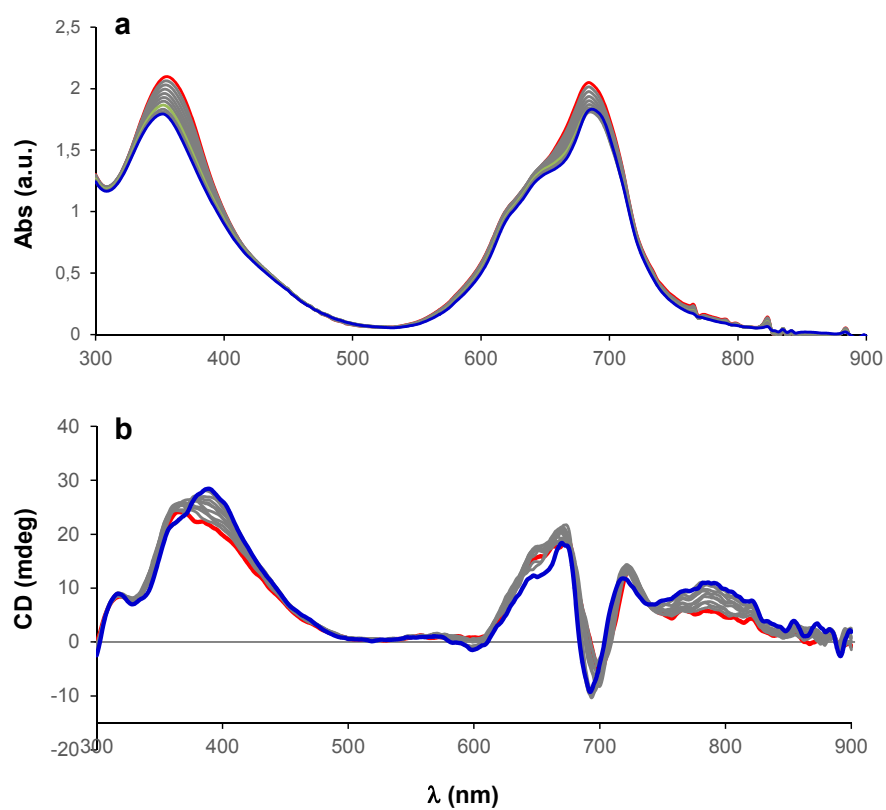

**Figure S6.** (a) Absorption and (b) CD spectra of Pc-G **1** in toluene at a  $4 \times 10^{-6}$  M concentration at different temperatures, from 268 K (blue spectra) to 368 K (red spectra).

The characteristic absorption and CD features of the (**1**)<sub>8</sub>·K<sup>+</sup> complex are maintained along the whole temperature range, suggestion no significant dissociation in toluene, even at low concentrations.

## References (S.I.)

- (i) D. González-Rodríguez, P. G. A. Janssen, R. Martín-Rapún, I. De Cat, S. De Feyter, A. P. H. J. Schenning, E. W. Meijer, *J. Am. Chem. Soc.* 2010, **132**, 4710.
- (ii) S. E. Maree and T. Nyokong, *J. Porphyr. Phthalocyanines*, 2001, **5**, 782.
- (iii) M. S. Marcuccio, I. Polina, S. Greenberg, A.B.P. Lever, C.C. Leznoff, B. Tomer, *Can. J. Chem.* 1985, **63**, 3057.
